# Supplementary material for: Generation of Angiotensin-Converting Enzyme 2/Transmembrane Protease Serine 2-Double-Positive Human Induced Pluripotent Stem Cell-Derived Spheroids for Anti-Severe Acute Respiratory Syndrome Coronavirus 2 Drug Evaluation
Source: PubMed Central journal article supplement (PMC9769601; doi:10.1128/spectrum.03490-22), 2022-10-31
Supplement: reviewer-comments.pdf [file reviewer-comments.pdf]

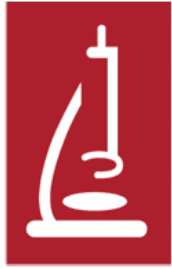

AMERICAN  
SOCIETY FOR  
MICROBIOLOGY

# Microbiology Spectrum

## Generation of ACE2/TMPRSS2-double-positive-hiPSC-derived Spheroids for Anti-SARS-CoV-2 drug evaluation

Nobuyo Higashi-Kuwata, Shigeru Yabe, Satsuki Fukuda, Junko Nishida, Miwa Tamura-Nakano, Shin-ichiro Hattori, Hitoshi Okochi, and Hiroaki Mitsuya

*Corresponding Author(s): Nobuyo Higashi-Kuwata, National Center for Global Health & Medicine Research Institute*

---

### Review Timeline:

Submission Date:

October 6, 2022

Accepted:

October 10, 2022

---

*Editor: Takamasa Ueno*

*Reviewer(s): The reviewers have opted to remain anonymous.*

### Transaction Report:

(Note: With the exception of the correction of typographical or spelling errors that could be a source of ambiguity, letters and reports are not edited. The original formatting of letters and referee reports may not be reflected in this compilation.)

**DOI:** <https://doi.org/10.1128/spectrum.03490-22>

October 10, 2022

Dr. Nobuyo Higashi-Kuwata  
National Center for Global Health & Medicine Research Institute  
Tokyo  
Japan

Re: Spectrum03490-22 (Generation of ACE2/TMPRSS2-double-positive-hiPSC-derived Spheroids for Anti-SARS-CoV-2 drug evaluation)

Dear Dr. Nobuyo Higashi-Kuwata:

Your manuscript has been accepted, and I am forwarding it to the ASM Journals Department for publication. You will be notified when your proofs are ready to be viewed.

The ASM Journals program strives for constant improvement in our submission and publication process. Please tell us how we can improve your experience by taking this quick [Author Survey](#).

As an open-access publication, Spectrum receives no financial support from paid subscriptions and depends on authors' prompt payment of publication fees as soon as their articles are accepted. You will be contacted separately about payment when the proofs are issued; please follow the instructions in that e-mail. Arrangements for payment must be made before your article is published. For a complete list of **Publication Fees**, including supplemental material costs, please visit our [website](#).

ASM policy requires that data be available to the public upon online posting of the article, so please verify all links to sequence records, if present, and make sure that each number retrieves the full record of the data. If a new accession number is not linked or a link is broken, provide production staff with the correct URL for the record. If the accession numbers for new data are not publicly accessible before the expected online posting of the article, publication of your article may be delayed; please contact the ASM production staff immediately with the expected release date.

Corresponding authors may [join or renew ASM membership](#) to obtain discounts on publication fees. Need to upgrade your membership level? Please contact Customer Service at [Service@asmusa.org](mailto:Service@asmusa.org).

Thank you for submitting your paper to Spectrum.

Sincerely,

Takamasa Ueno  
Editor, Microbiology Spectrum

Journals Department  
American Society for Microbiology  
1752 N St., NW  
Washington, DC 20036  
E-mail: [spectrum@asmusa.org](mailto:spectrum@asmusa.org)

Supplemental Material FOR Publication: Accept
